# Supplementary material for: A Danish version of the oral health impact profile-14 (OHIP-14): translation and cross-cultural adaptation
Source: Springer Nature journal article supplement (doi:10.1186/s12903-020-01242-z), 2020-09-10
Supplement: MOESM1 [file 18366796]

**Appendix A-** OHIP-14 questionnaires; the original English version and the translated Danish version (OHIP-14-DK).

**1. OHIP-14 questionnaire-English version (Slade et al. 1997)**

| <i>During the last 12 months, how often has the following occurred?</i> |                                                                                                                       |               |
|-------------------------------------------------------------------------|-----------------------------------------------------------------------------------------------------------------------|---------------|
| <b>Dimension</b>                                                        | <b>Question</b>                                                                                                       | <b>Weight</b> |
| <i>Functional limitation</i>                                            | Have you had trouble <i>pronouncing any words</i> because of problems with your teeth, mouth or dentures?             | 0.51          |
|                                                                         | Have you felt that your <i>sense of taste</i> has worsened because of problems with your teeth, mouth or dentures?    | 0.49          |
| <i>Physical pain</i>                                                    | Have you had <i>painful aching</i> in your mouth?                                                                     | 0.34          |
|                                                                         | Have you found it <i>uncomfortable to eat any foods</i> because of problems with your teeth, mouth or dentures?       | 0.66          |
| <i>Psychological discomfort</i>                                         | Have you been <i>self-conscious</i> of your teeth, mouth or dentures?                                                 | 0.45          |
|                                                                         | Have you <i>felt tense</i> because of problems with your teeth, mouth or dentures?                                    | 0.55          |
| <i>Physical disability</i>                                              | Has your <i>diet been unsatisfactory</i> because of problems with your teeth, mouth or dentures?                      | 0.52          |
|                                                                         | Have you had to <i>interrupt meals</i> because of problems with your teeth, mouth or dentures?                        | 0.48          |
| <i>Psychological disability</i>                                         | Have you found it <i>difficult to relax</i> because of problems with your teeth, mouth or dentures?                   | 0.60          |
|                                                                         | Have you been a bit <i>embarrassed</i> because of problems with your teeth, mouth or dentures?                        | 0.40          |
| <i>Social disability</i>                                                | Have you been a bit <i>irritable with other people</i> because of problems with your teeth, mouth or dentures?        | 0.62          |
|                                                                         | Have you had <i>difficulty doing your usual jobs</i> because of problems with your teeth, mouth or dentures?          | 0.38          |
| <i>Handicap</i>                                                         | Have you felt that life in general was <i>less satisfying</i> because of problems with your teeth, mouth or dentures? | 0.59          |
|                                                                         | Have you been <i>totally unable to function</i> because of problems with your teeth, mouth or dentures?               | 0.41          |

**Responses are made on a 5-point scale, coded 0=never, 1=hardly ever, 2=occasionally, 3=fairly often, 4=very often.**

## 2. OHIP-14 questionnaire-Danish version (OHIP-14-DK).

Dette spørgeskema handler om sammenhæng mellem livskvalitet og sundhed i mundhulen (Oral Health Related Quality of Life (OHRQoL)). Besvar venligst spørgsmålene neden for om din orale sundhed med udgangspunkt i det seneste år. Hvert spørgsmål skal besvares ved at angive en enkelt svarmulighed.

| Spørgsmål |                                                                                                            | Svar                                                                                                                                                                                                                   |
|-----------|------------------------------------------------------------------------------------------------------------|------------------------------------------------------------------------------------------------------------------------------------------------------------------------------------------------------------------------|
| 1         | Har du haft problemer med at <i>udtale ord</i> på grund af problemer med dine tænder, mund eller gebis?    | <input type="checkbox"/> 0 = Aldrig<br><input type="checkbox"/> 1 = Næsten aldrig<br><input type="checkbox"/> 2 = Nogle gange<br><input type="checkbox"/> 3 = Temmelig ofte<br><input type="checkbox"/> 4 = Meget ofte |
| 2         | Har du følt, at din <i>smagsevne</i> er forringet på grund af problemer med dine tænder, mund eller gebis? | <input type="checkbox"/> 0 = Aldrig<br><input type="checkbox"/> 1 = Næsten aldrig<br><input type="checkbox"/> 2 = Nogle gange<br><input type="checkbox"/> 3 = Temmelig ofte<br><input type="checkbox"/> 4 = Meget ofte |
| 3         | Har du haft stærke <i>smertes</i> i din mund?                                                              | <input type="checkbox"/> 0 = Aldrig<br><input type="checkbox"/> 1 = Næsten aldrig<br><input type="checkbox"/> 2 = Nogle gange<br><input type="checkbox"/> 3 = Temmelig ofte<br><input type="checkbox"/> 4 = Meget ofte |
| 4         | Har det været <i>ubehageligt at spise mad</i> på grund af problemer med dine tænder, mund eller gebis?     | <input type="checkbox"/> 0 = Aldrig<br><input type="checkbox"/> 1 = Næsten aldrig<br><input type="checkbox"/> 2 = Nogle gange<br><input type="checkbox"/> 3 = Temmelig ofte<br><input type="checkbox"/> 4 = Meget ofte |
| 5         | Har du følt dig <i>forlegen</i> på grund af dine tænder, mund eller gebis?                                 | <input type="checkbox"/> 0 = Aldrig<br><input type="checkbox"/> 1 = Næsten aldrig<br><input type="checkbox"/> 2 = Nogle gange<br><input type="checkbox"/> 3 = Temmelig ofte<br><input type="checkbox"/> 4 = Meget ofte |
| 6         | Har du følt dig <i>anspændt</i> på grund af problemer med dine tænder, mund eller gebis?                   | <input type="checkbox"/> 0 = Aldrig<br><input type="checkbox"/> 1 = Næsten aldrig<br><input type="checkbox"/> 2 = Nogle gange<br><input type="checkbox"/> 3 = Temmelig ofte<br><input type="checkbox"/> 4 = Meget ofte |
| 7         | Har din <i>kost været utilfredsstillende</i> på grund af problemer med dine tænder, mund eller gebis?      | <input type="checkbox"/> 0 = Aldrig<br><input type="checkbox"/> 1 = Næsten aldrig<br><input type="checkbox"/> 2 = Nogle gange<br><input type="checkbox"/> 3 = Temmelig ofte<br><input type="checkbox"/> 4 = Meget ofte |
| 8         | Har du måtte <i>afbryde måltider</i> på grund af problemer med dine tænder, mund eller gebis?              | <input type="checkbox"/> 0 = Aldrig<br><input type="checkbox"/> 1 = Næsten aldrig                                                                                                                                      |

|           |                                                                                                                                  |                                                                                                                                                                                                                        |
|-----------|----------------------------------------------------------------------------------------------------------------------------------|------------------------------------------------------------------------------------------------------------------------------------------------------------------------------------------------------------------------|
|           |                                                                                                                                  | <input type="checkbox"/> 2 = Nogle gange<br><input type="checkbox"/> 3 = Temmelig ofte<br><input type="checkbox"/> 4 = Meget ofte                                                                                      |
| <b>9</b>  | Har du <i>haft svært ved at slappe af</i> på grund af problemer med dine tænder, mund eller gebis?                               | <input type="checkbox"/> 0 = Aldrig<br><input type="checkbox"/> 1 = Næsten aldrig<br><input type="checkbox"/> 2 = Nogle gange<br><input type="checkbox"/> 3 = Temmelig ofte<br><input type="checkbox"/> 4 = Meget ofte |
| <b>10</b> | Har du følt dig lidt <i>fløv</i> på grund af problemer med dine tænder, mund eller gebis?                                        | <input type="checkbox"/> 0 = Aldrig<br><input type="checkbox"/> 1 = Næsten aldrig<br><input type="checkbox"/> 2 = Nogle gange<br><input type="checkbox"/> 3 = Temmelig ofte<br><input type="checkbox"/> 4 = Meget ofte |
| <b>11</b> | Har du været lidt <i>irritabel over for andre personer</i> på grund af problemer med dine tænder, mund eller gebis?              | <input type="checkbox"/> 0 = Aldrig<br><input type="checkbox"/> 1 = Næsten aldrig<br><input type="checkbox"/> 2 = Nogle gange<br><input type="checkbox"/> 3 = Temmelig ofte<br><input type="checkbox"/> 4 = Meget ofte |
| <b>12</b> | Har du haft <i>svært ved at løse dine normale opgaver</i> på grund af problemer med dine tænder, mund eller gebis?               | <input type="checkbox"/> 0 = Aldrig<br><input type="checkbox"/> 1 = Næsten aldrig<br><input type="checkbox"/> 2 = Nogle gange<br><input type="checkbox"/> 3 = Temmelig ofte<br><input type="checkbox"/> 4 = Meget ofte |
| <b>13</b> | Har du følt at livet generelt har været <i>mindre tilfredsstillende</i> på grund af problemer med dine tænder, mund eller gebis? | <input type="checkbox"/> 0 = Aldrig<br><input type="checkbox"/> 1 = Næsten aldrig<br><input type="checkbox"/> 2 = Nogle gange<br><input type="checkbox"/> 3 = Temmelig ofte<br><input type="checkbox"/> 4 = Meget ofte |
| <b>14</b> | Har du været <i>helt ude af stand til at fungere</i> på grund af problemer med dine tænder, mund eller gebis?                    | <input type="checkbox"/> 0 = Aldrig<br><input type="checkbox"/> 1 = Næsten aldrig<br><input type="checkbox"/> 2 = Nogle gange<br><input type="checkbox"/> 3 = Temmelig ofte<br><input type="checkbox"/> 4 = Meget ofte |
