# Supplementary material for: A Danish version of the oral health impact profile-14 (OHIP-14): translation and cross-cultural adaptation
Source: Springer Nature journal article supplement (doi:10.1186/s12903-020-01242-z), 2020-09-10

## Appendix B

Readability test results <https://www.webfx.com/tools/read-able/>

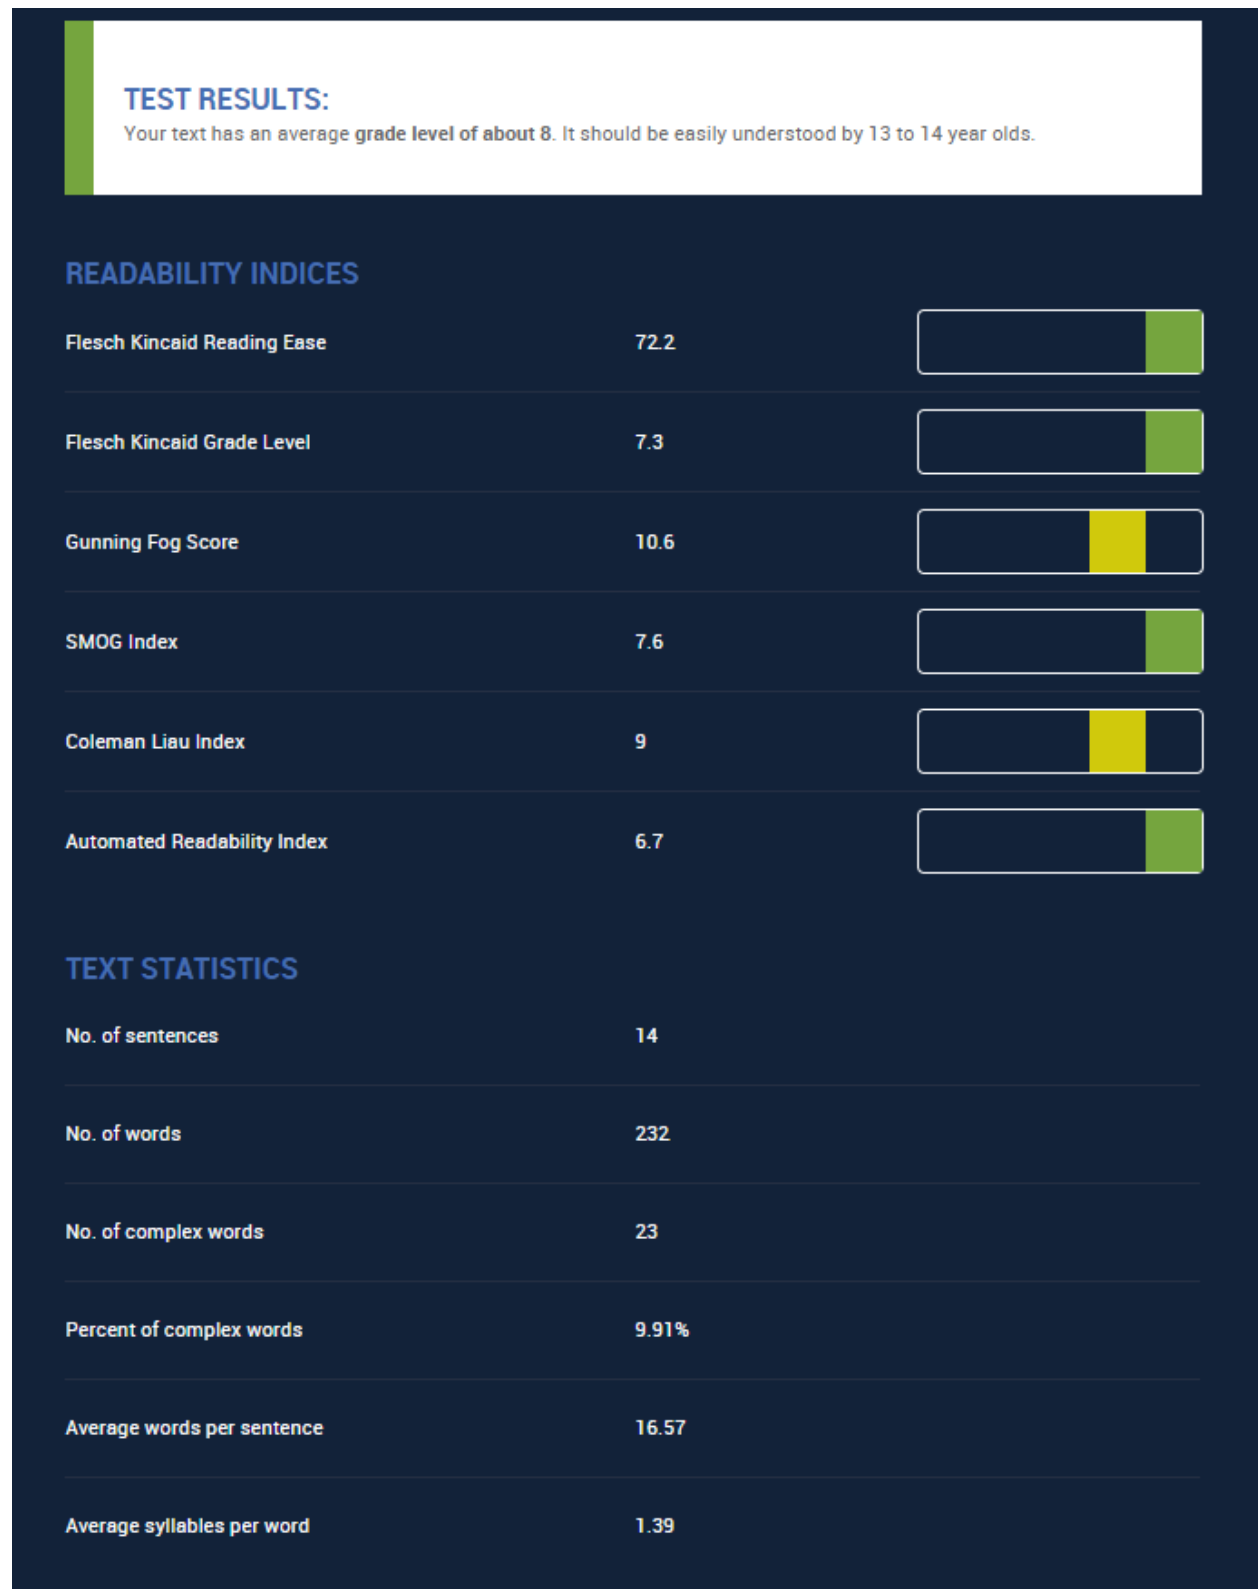

Supplement: MOESM2 [file 18366796]
